# Supplementary material for: Service-integration approaches for families with low income: a Families First Edmonton, community-based, randomized, controlled trial
Source: Springer Nature journal article supplement (doi:10.1186/s13063-016-1444-8), 2016-07-22
Supplement: MOESM1 [file 10514660]

## Basic Needs

Social services that help families address material shortages such as:

- Food
- Clothing
- Housing/Shelter (excluding emergency shelters for domestic violence situations)

This typology also includes government subsidy programs for low-income families with children as these subsidies help families cover the cost of basic needs.

---

### Examples of "Basic Needs" service providers:

- Alberta Adult Health Benefit
- Alberta Child Health Benefit
- Alberta Works - Child Support Services
- Assured Income for the Severely Disabled
- Basic Shelf Program
- Bissell Centre
- Boyle Street Co-Op/Boyle Street Community Services
- Bread Run
- Canada Revenue Agency (Alberta Family Employment Tax Credit)
- Canadian Native Friendship Centre
- Capital Region Housing Corporation
- Child Care Subsidy Program
- Christmas Bureau of Edmonton
- Christmas Dinner
- Christmas Hampers
- Clothing
- Coats for Kids and Families
- Community Lunches
- Dickinsfield Amity House (Swap Shop)
- Edmonton Catholic Schools (Provision of Basic Services)
- Edmonton Gleaners Association (Food Banks)
- Edmonton Inner City Housing Society
- Edmonton's School Lunch Program
- Excess Food Program
- Food Banks
- Food Basket Depots
- Food Co-op
- Food Donations
- Food Hampers
- Food Programs

Free Clothing  
Goodwill Industries of Alberta  
Goodwill Thrift Shops  
Habitat for Humanity Edmonton Society  
Hope Terrace  
Housing Supports  
Marian Centre (Soup Kitchen/Bagged Lunches)  
Metis Urban Housing Corporation of Alberta  
Mustard Seed Street Church  
Out of School Care Subsidies  
Salvation Army Community and Family Services  
Santa's Anonymous  
Social Assistance  
Social Services  
Society of Learning and Community Outreach (Bread Run)  
Soup Kitchens  
St. Vincent de Paul Society  
Student Financial Aid  
Student Food Bank  
Suit Yourself, the Edmonton Wardrobe for Women in Need  
Supports for Independence (SFI)  
Swap Shop  
The Direct Rent Supplement Program  
The Family Network Shelter (Basic and Emergency Services)  
Thrift Stores  
Toys for Tots  
United Way of the Alberta Capital Region (Coats for Kids and Families)  
Unity Centre of Northeast Edmonton (Food Program)  
WeCan Cooperative for Community and Economic Development (Food Basket  
Depots)  
Welfare

## Family Challenges

Social services used by families who are experiencing unique challenges. These services assist families with family challenges such as:

- Family violence
- Addictions
- Parole
- Mediation services
- Child services (related to the care and safety of children)

---

### Examples of "Family Challenges" services providers:

- 24 hour Safety Unit (Child and Family Services Authority #6)
- AADAC (Alberta Alcohol and Drug Abuse Commission)
- Aboriginal Child and Family Support Program (Métis Child and Family Services Society of Edmonton)
- Aboriginal Consulting Services Association (Circle of Safety)
- Aboriginal Consulting Services Association (Family Violence Teaching Circle for Women)
- Aboriginal Family Wellness Program (Native Counseling Services of Alberta)
- Abused Women's Support Group (Mill Woods Family Resource Centre)
- Addiction and Recovery Program (LDS)
- Addiction Treatment Centres
- Adoption Services (Alberta Government Services)
- Adult Groups (Mill Woods Family Resource Centre)
- Alberta Justice & Attorney General
- Alberta Solicitor General and Public Security
- Catholic Social Services (Family Living Program, Family-Teen Mediation)
- Child Abuse Hotline
- Child Protective Services (Alberta Government Services)
- Child Welfare (Alberta Government Services)
- Children's Services (Child Abuse and Neglect) (Alberta Government Services)
- Co-Dependents Anonymous
- Domestic Violence Support Group
- Edmonton Chapter Alcoholics Anonymous
- Edmonton Community Legal Centre
- Edmonton Police Services
- Family Enhancement Program (Alberta Government Services)
- Family Enhancement Program (Child and Family Services Authority #6)
- Family Ties program (Edmonton YMCA)
- Family Violence Prevention Centre (Edmonton John Howard Society)
- Lawyers
- Legal Aid Society of Alberta

Making Connections Groups (Abused Women) (City of Edmonton)  
Mediation Services  
National Parole Board  
Saint Therese Project (Grey Nuns Hospital)  
Sexual Assault Centre of Edmonton  
Shelters  
St. Albert Stop Abuse in Families (SAIF) Society  
Suicide Prevention and Crisis Line (Salvation Army)  
The Mediation and Restorative Justice Centre  
The Support Network  
Transitions Rehabilitation Association of St. Albert and District  
Understanding Anger for Women (KARA)  
WINGS of Providence Society (Crisis Shelter)

## Child Development

Social services that support the development of children and families. Services accessed by families include:

- Immunization and “Health for Two” programs
- Educational programs for children
- Parenting support programs
- Social and recreation focused programs for children and youth (e.g., youth drop in centres)

This typology excludes programs that have a child care component (e.g., ABC Head Start).

---

### Examples of “Child Development” service providers:

- Abbottsfeld Youth Project Society
- ASSIST Community Services Centre
- Association for Safe Alternatives in Childbirth
- Ben Calf Robe Society
- Bent Arrow Traditional Healing Society
- Big Sister and Big Brother Society of Edmonton and Area
- Boys’ and Girls’ Clubs of Edmonton
- Alberta Health Services and Caritas Health  
(immunization, perinatal, and Health for Two programs)
- Catholic Social Services
- Centre for Family Literacy
- Edmonton Catholic Schools (parenting classes)
- Edmonton Federation of Community Leagues
- Edmonton Public Libraries
- KARA Family Support Centre
- La Leche League
- Multicultural Health Brokers
- Native Counseling Services of Alberta
- Norwood Child and Family Resource Centre (Healthy Families program)
- Terra Centre for Pregnant and Parenting Teens (parenting program)
- Various churches (parenting classes/groups)
- Mill Woods Family Resource Centre

## Health Care

Health services or services that help families access mental or physical health services.

---

### Examples of "Health" service providers:

Acne Clinics of Canada  
Alberta Blue Cross  
Alberta Cancer Board  
Alberta Health Care Insurance Plan  
Alberta Health Services and Caritas Health  
Alberta Mental Health Board  
Alternative Medical Services  
Alberta Health Services  
Capital Health  
Children's Mental Health Regional Intake  
Child Psychiatry Associates  
Dentists (*various*)  
Edmonton Emergency Response Department  
Edmonton General Continuing Care Centre  
Emergency Services  
Health Care Research Studies  
Health Centres (*various*)  
Health Food Stores (*various*)  
Hys Centre  
Laboratories (including Diagnostic Testing Centres)(*various*)  
Medical Clinics (*various*)  
Medical Specialists (*various*)  
Natural Health Centres  
Opticians  
Oxygen Suppliers  
Pharmacies (*various*)  
Physiotherapists (*various*)  
Poison Prevention and Control Program  
Prosthetic and Orthotic Services (*various*)  
Psychologists  
Rehabilitation Services  
St. Michael's Health Group  
University of Alberta (Department of Dentistry)  
Weight Loss programs (*various*)

## Child Care

Services that provide child care. Types of services include:

All day, before, or after school care

Respite care

Child development programs if there is a child care component (e.g., ABC Head Start).

This category excludes “courtesy” child care provided by dentists or doctors.

---

### Examples of “Child Care” services providers:

Alberta AdaptAbilities Association (Drop in Respite)

Bissell Centre (Drop-In Day Care services)

CANDORA

Catholic Social Services

Churches

Day Cares (*various*)

Day Homes (*various*)

Dickinsfield Amity House

Edmonton Catholic Schools

Edmonton Gleaners Association (Crystal Kids Youth Centre)

Edmonton Mennonite Centre for Newcomers

Edmonton YMCA (Respite, Daycares, Out of School care)

Family Linkages Foundation of Alberta (Respite)

Family support for children with disabilities (childcare support) - Alberta Government

Fulton Child Care Centre

Glengarry Child Care Society (Boys and Girls Clubs of Edmonton)

Hardisty Family Relief Services (Respite)

Jasper Place Child and Family Resource Centre (Child Care program)

KARA Family Support Centre

Kids Kottage Foundation (Crisis Nursery)

Mill Woods Recreation Centre

Multicultural Health Brokers

Oliver Centre Early Learning Programs for Children and Families Society

Persons with Developmental Disabilities (Edmonton Community Board) (Respite)

Public school daycares

Woodcroft Relief Home (Respite)

YWCA - Respite and Host Family program

### **Other services**

Social services that did not thematically fit with the preceding categories or the service provided was unclear. Future category development may be limited due to low sample sizes.
